# Supplementary material for: Pulsed Electromagnetic Field (PEMF) Treatment Ameliorates Murine Model of Collagen-Induced Arthritis
Source: MDPI journal article supplement (doi:10.3390/ijms24021137), 2023-01-06
Supplement: s1 [file s1]

**[Supplementary data to International Journal of Molecular Sciences]**

**Pulsed Electromagnetic Field (PEMF) Treatment Ameliorates Murine Model  
of Collagen-Induced Arthritis**

Ju-Eun Hong <sup>1</sup>, Chang-Gun Lee <sup>1,2</sup>, Soonjae Hwang <sup>1,3</sup>, Junyoung Kim <sup>4</sup>, Minjeong Jo <sup>1,5</sup>,  
Da-Hye Kang <sup>1</sup>, Sang-Hyeon Yoo <sup>1</sup>, Woo-Seung Kim <sup>1</sup>, Yongheum Lee <sup>4</sup> and Ki-Jong Rhee <sup>1,\*</sup>

<sup>1</sup> Department of Biomedical Laboratory Science, College of Software and Digital Healthcare Convergence,  
Yonsei University MIRAE Campus, Wonju 26493, Republic of Korea

<sup>2</sup> Department of Medical Genetics, Ajou University School of Medicine, Suwon 16499, Republic of Korea

<sup>3</sup> Department of Biochemistry, Lee Gil Ya Cancer and Diabetes Institute, GAIHST, Gachon University College of  
Medicine, Incheon 21999, Republic of Korea

<sup>4</sup> Department of Biomedical Engineering, College of Software and Digital Healthcare Convergence, Yonsei  
University MIRAE Campus, Wonju 26493, Republic of Korea

<sup>5</sup> Department of Molecular Cell Biology, Sungkyunkwan University School of Medicine,  
Suwon 16419, Republic of Korea

\* Correspondence: [kjrhee@yonsei.ac.kr](mailto:kjrhee@yonsei.ac.kr); Tel.: +82-33-760-2445; Fax: +82-33-760-2195

**Supplementary Figure S1. PEMF treatment scheme**

**Supplementary Figure S2. PEMF device**

**Supplementary Figure S3. Clinicopathologic severity scoring of arthritis in CIA mice**

**Supplementary Figure S4. Histologic inflammation scoring in CIA mice**

**Supplementary Figure S5. Cartilage damage scoring in CIA mice**

**Supplementary Table S1. PEMF intensity relative to coil distance**

**Supplementary Table S2. Antibodies used in this study**

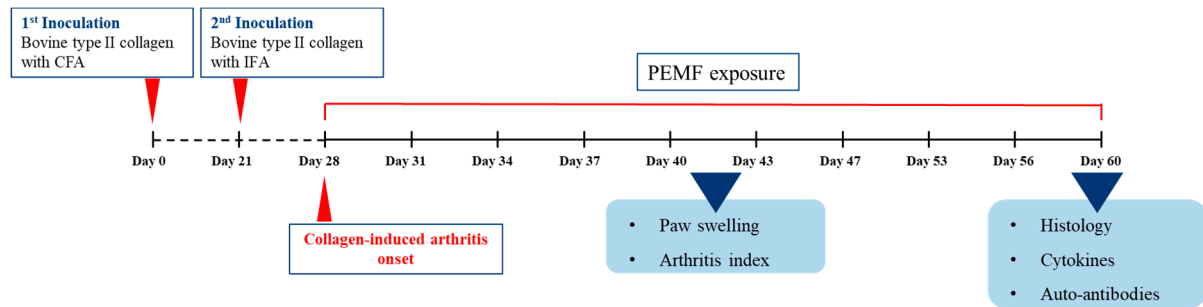

### Supplementary Figure S1. PEMF treatment scheme

Mice were inoculated with bovine type II collagen and complete Freund's adjuvant (CFA) at day 0. At day 21, mice were inoculated with bovine type II collagen and incomplete Freund's adjuvant (IFA). At day 28, mice were continuously treated with PEMF (10 Hz or 75 Hz) until termination of the experiment (day 60). Clinicopathologic evaluation (paw swelling, arthritis index) was performed from day 28 every 2-3 days. At day 60, sera and tissues were harvested and examined.

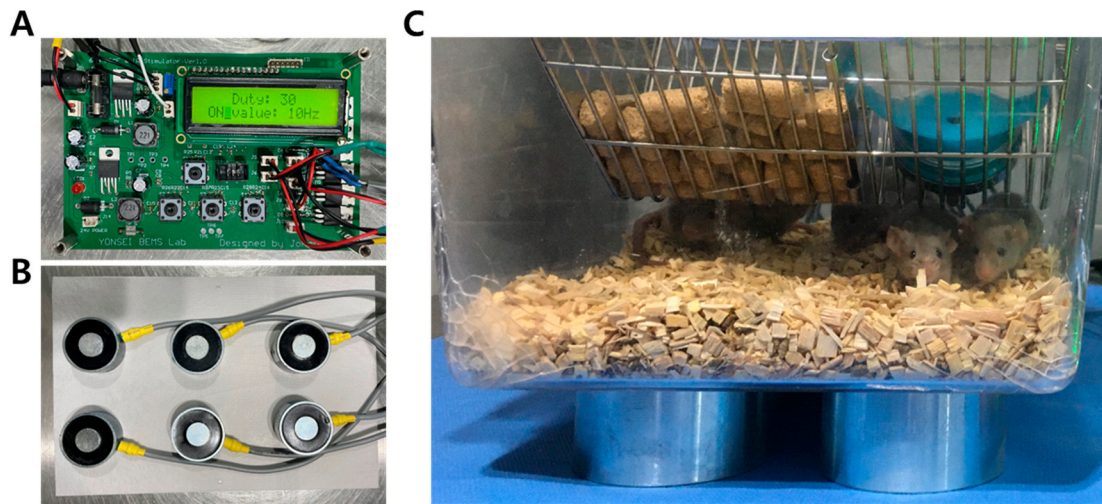

### Supplementary Figure S2. PEMF device

(A) PEMF control panel. The control panel allows regulation of Hz. (B) PEMF generator. Six PEMF coils were placed under the mouse cage. (C) Placement of mouse cages on PEMF coils. The set of six cores were placed underneath the mouse housing cage and the mice were exposed to PEMF continuously.

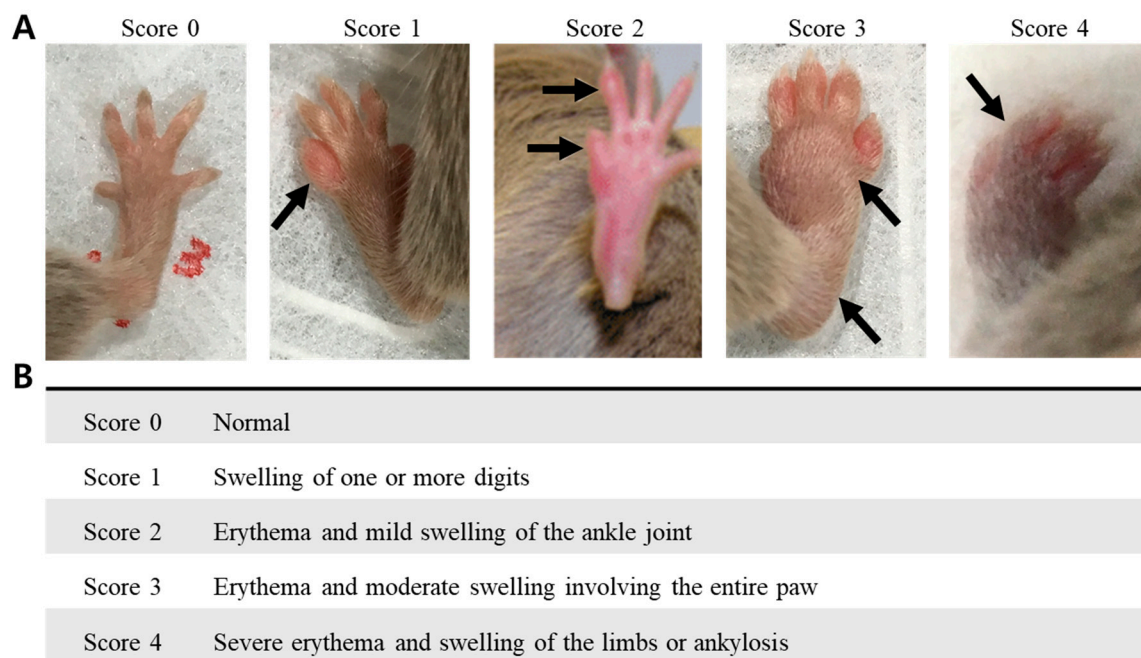

**Supplementary Figure S3. Clinicopathologic severity scoring of arthritis in CIA mice**

(A) Gross images of mouse paws after CIA induction. Representative images are shown. (B) Scoring scheme for assessing arthritis severity.

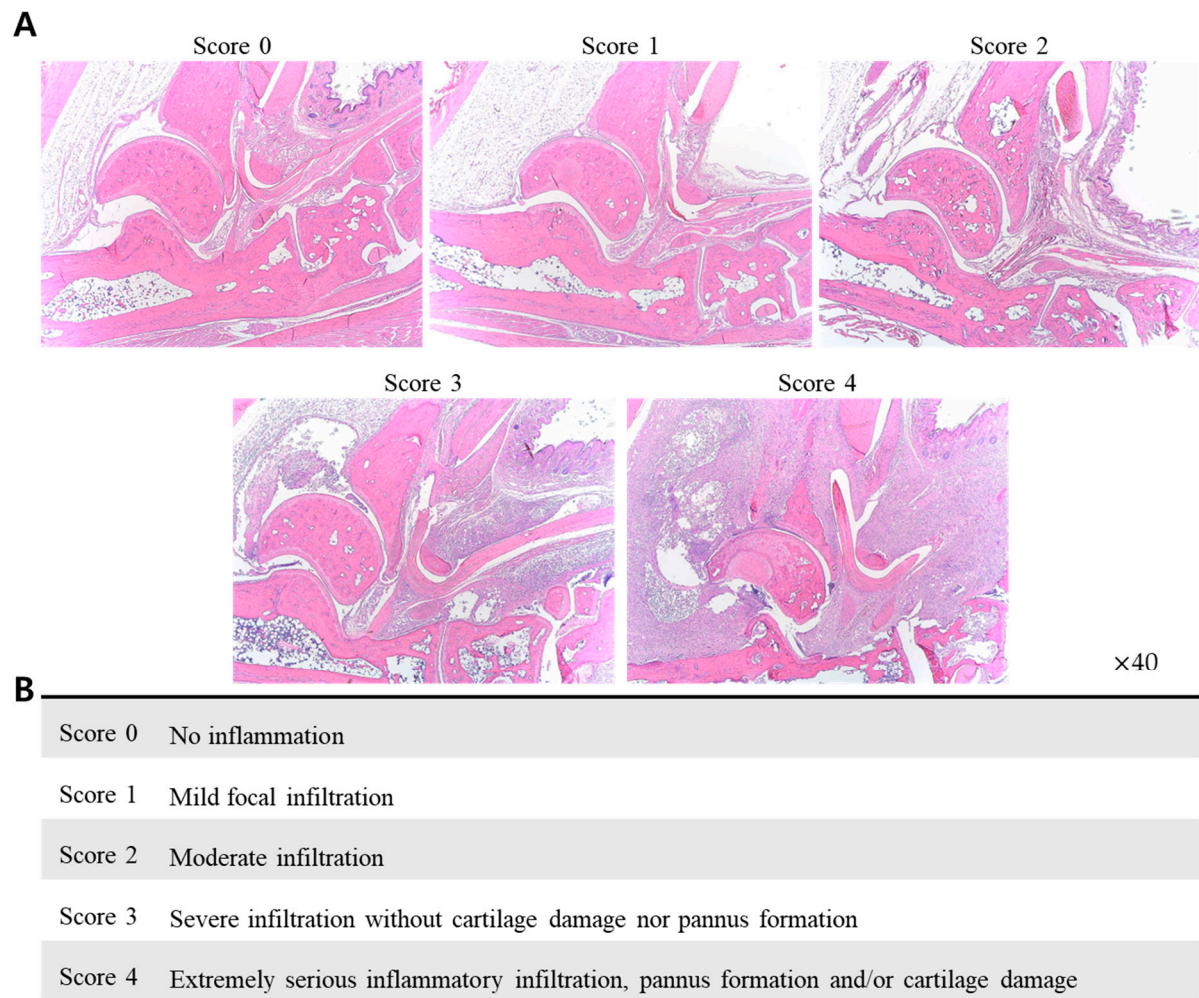

**Supplementary Figure S4. Histologic inflammation scoring in CIA mice**

(A) H&E stained sections of mouse arthritic regions of mouse paws. Representative images are shown.

(B) Scoring scheme for assessing arthritis severity of histologic sections.



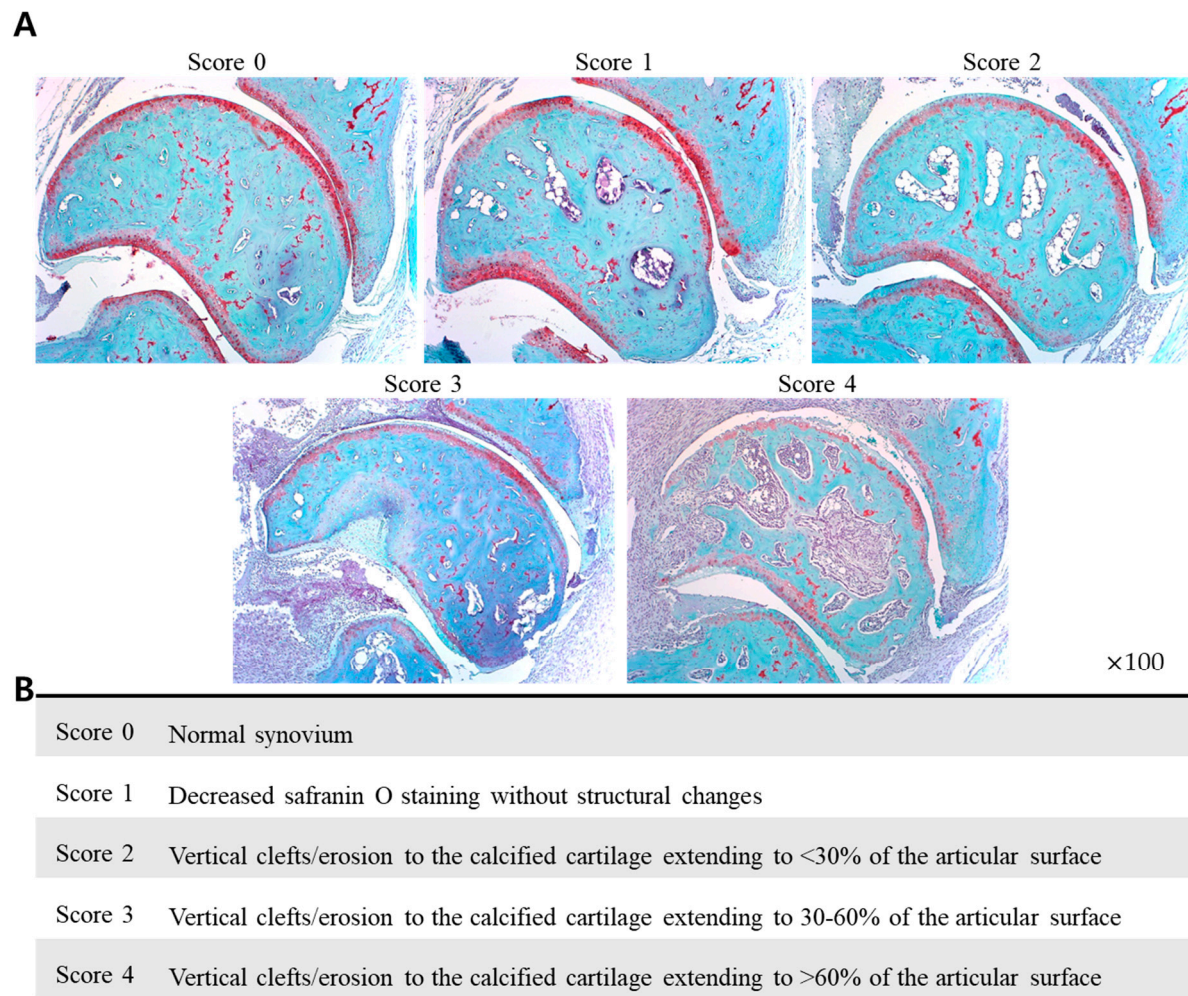

**Supplementary Figure S5. Cartilage damage scoring in CIA mice**

(A) Safranin O stained sections of mouse arthritic regions of mouse paws. Representative images are shown. (B) Scoring scheme for assessing cartilage damage.

**Supplementary Table S1. PEMF intensity relative to coil distance**

| Distance (cm) | Hertz (Hz) | Gauss (G) |
|---------------|------------|-----------|
| 0~1           | 10         | 262       |
|               | 75         | 146.7     |
| 1~2           | 10         | 145       |
|               | 75         | 85.9      |
| 2~3           | 10         | 46        |
|               | 75         | 45.2      |

The intensity (Gauss) differs based on the Hertz setting and also the distance from the magnetic coil.  
The intensity of PEMF from the distance from the coil.

**Supplementary Table S2. Antibodies used in this study**

| Target protein             | Concentration/<br>Dilution Factor | Company (Cat. No.)                   |
|----------------------------|-----------------------------------|--------------------------------------|
| IL-6                       | 3 ug/ml                           | R&D Systems (AF-406)                 |
| IL-1 $\beta$               | 3 ug/ml                           | R&D Systems (AF-401)                 |
| TNF- $\alpha$              | 2 ug/ml                           | R&D Systems (AF-410)                 |
| RANK                       | 3 ug/ml                           | R&D Systems (AF-692)                 |
| RANKL                      | 3 ug/ml                           | R&D Systems (AF-462)                 |
| IL-6R                      | 1:300                             | Invitrogen (PA5-102425)              |
| TNFR1                      | 1:300                             | Invitrogen (33-0100)                 |
| Rabbit anti-Goat IgG (H&L) | 1:500                             | Jackson ImmunoResearch (305-065-003) |
| Goat Anti-Mouse IgG (H&L)  | 1:500                             | Jackson ImmunoResearch (115-065-166) |
| Goat Anti-Rabbit IgG (H&L) | 1:500                             | Jackson ImmunoResearch (111-065-003) |
